# Supplementary material for: Multi-assessed green sustainable chromatographic resolution of nicotine and caffeine; application to in-vitro release from a new quick mist mouth spray co-formula
Source: PubMed Central journal article supplement (PMC11476497; doi:10.1186/s13065-024-01306-z), 2024-10-15
Supplement: 13065_2024_1306_MOESM1_ESM.pdf [file 13065_2024_1306_MOESM1_ESM.pdf]

## Supplementary materials

**Multi-assessed green sustainable chromatographic resolution of nicotine and caffeine; application to in-vitro release from a new quick mist mouth spray co-formula**

**Yomna A. Salem<sup>1\*</sup>, Ahmed Emad F. Abbas<sup>2</sup>, Amgad E. Salem<sup>3</sup>, Aya A. Abdella<sup>4</sup>, Amal A. El-Masry<sup>5</sup>**

1. Yomna A. Salem (\*Corresponding author)

Department of Pharmaceutical Chemistry, Faculty of Pharmacy, Sinai University – Kantara Branch, Ismailia 41636, Egypt.

Email: [Yomna.abdulaziz@su.edu.eg](mailto:Yomna.abdulaziz@su.edu.eg) & [yomnasalem26@gmail.com](mailto:yomnasalem26@gmail.com)

Tel. +201023622361

2. Ahmed Emad F. Abbas

Department of Pharmaceutical Analytical Chemistry, Faculty of Pharmacy, October 6 University, 6 October City, Giza 12585, Egypt.

Email: [ahmed.emad.pha@o6u.edu.eg](mailto:ahmed.emad.pha@o6u.edu.eg)

3. Amgad E. Salem

Department of Pharmaceutics, Faculty of Pharmacy, Mansoura University, Mansoura, 35516, Egypt.

Email: [amgadsalem@mans.edu.eg](mailto:amgadsalem@mans.edu.eg)

4. Aya A. Abdella, PhD

Department of Pharmaceutical Analytical Chemistry, Faculty of Pharmacy, Tanta University, Elguish street (Medical Campus), 31527 Tanta, Egypt

Email: [Aya.atef.86@gmail.com](mailto:Aya.atef.86@gmail.com)

5. Amal A. El-Masry

Department of Medicinal Chemistry, Faculty of Pharmacy, Mansoura University, Mansoura, 35516, Egypt.

Email: [dr.Amal90@mans.edu.eg](mailto:dr.Amal90@mans.edu.eg)

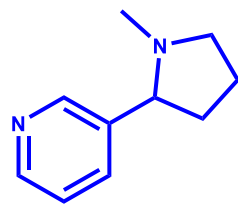

**Nicotine (NIC)**

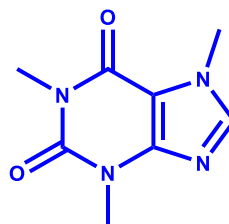

**Caffeine (CAF)**

**Fig. S1.** Structural formula of nicotine (NIC) and caffeine (CAF)

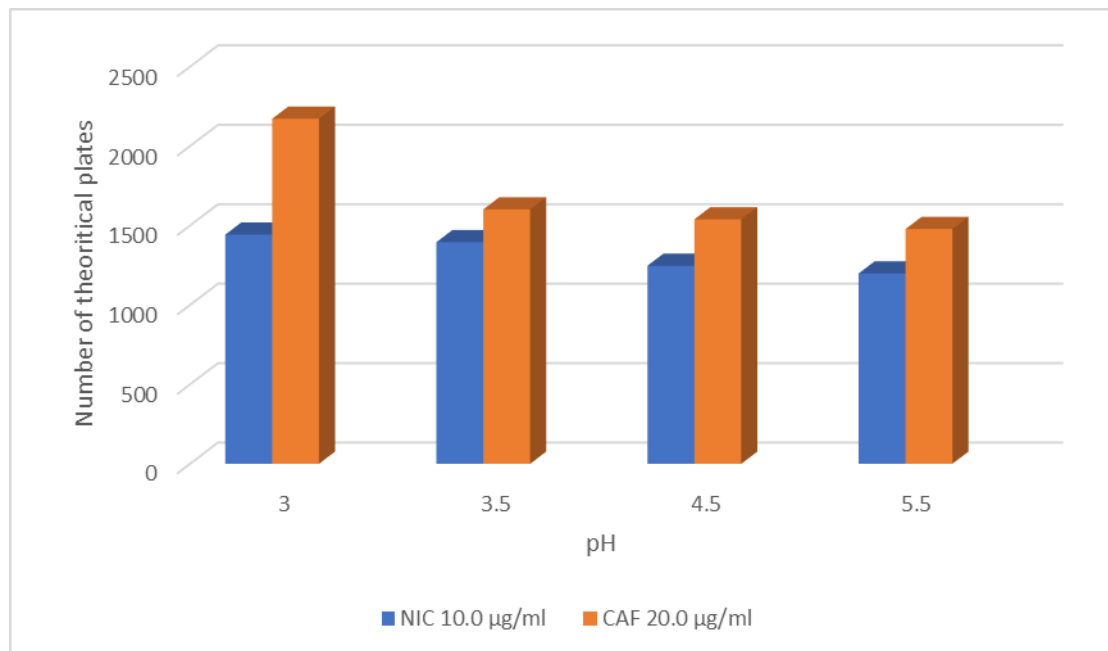

**Fig. S2.** Effect of different pH on the number of theoretical plates of NIC 10.0 µg/ml and CAF 20.0 µg/ml using mobile phase consisting of Glycerol: 0.2 M OPA, (5: 95% v/v). Flow rate, 1.0 mL/min, UV detection at 260 nm; column temperature, 40 degrees Celsius.

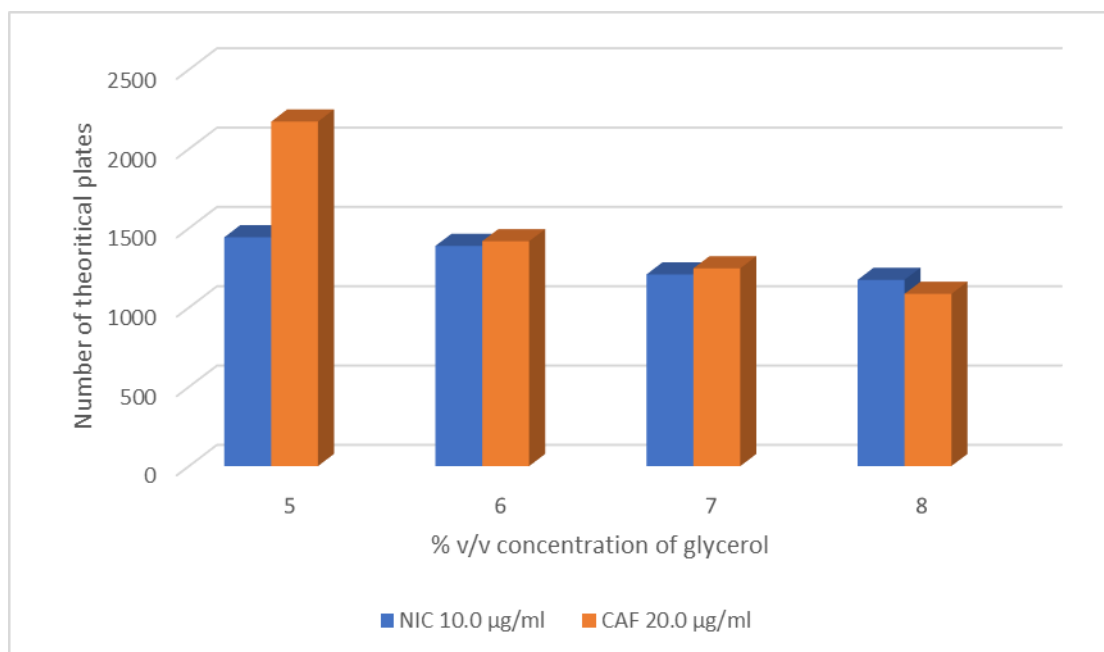

**Fig. S3.** Effect of different % v/v concentration of glycerol on the number of theoretical plates of NIC 10.0 µg/ml and CAF 20.0 µg/ml using a mobile phase containing 0.2 M OPA pH 3.0, Flow rate, 1.0 mL/min, column temperature, 40 degrees Celsius.

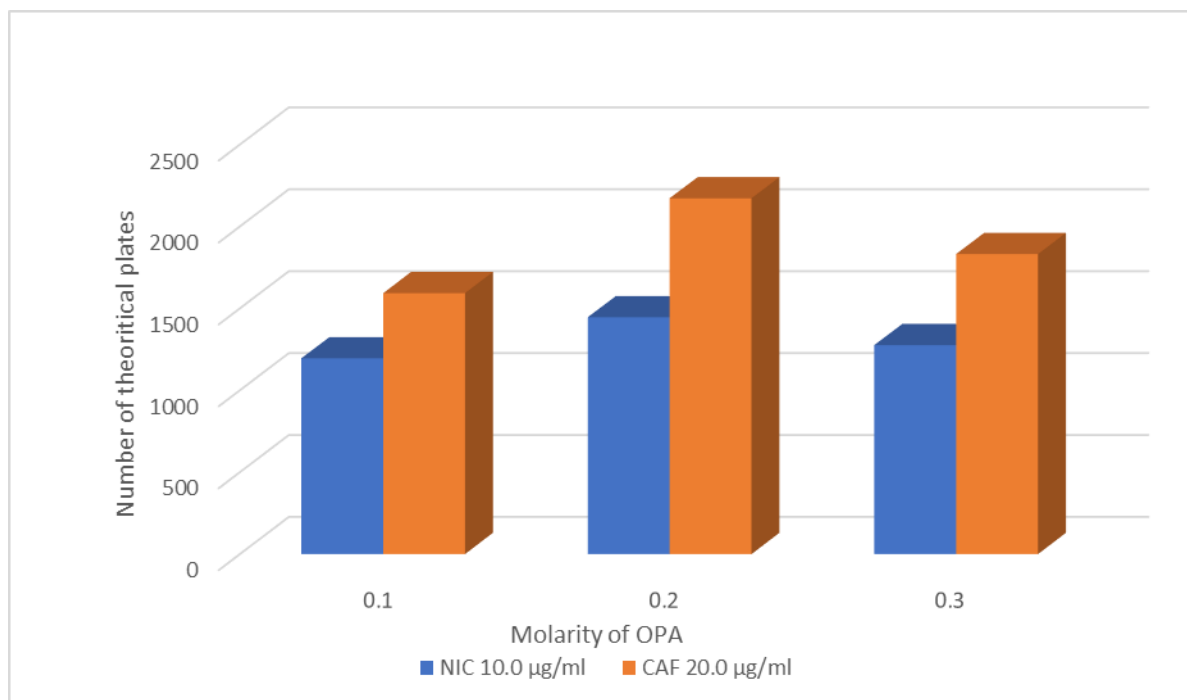

**Fig. S4.** Effect of different molarity of OPA on the number of theoretical plates of NIC 10.0 µg/ml and CAF 20.0 µg/ml using a mobile phase mobile phase consisting of Glycerol: 0.2 M OPA, (5: 95% v/v), pH 3.0, Flow rate, 1.0 mL/min, column temperature, 40 degrees Celsius.

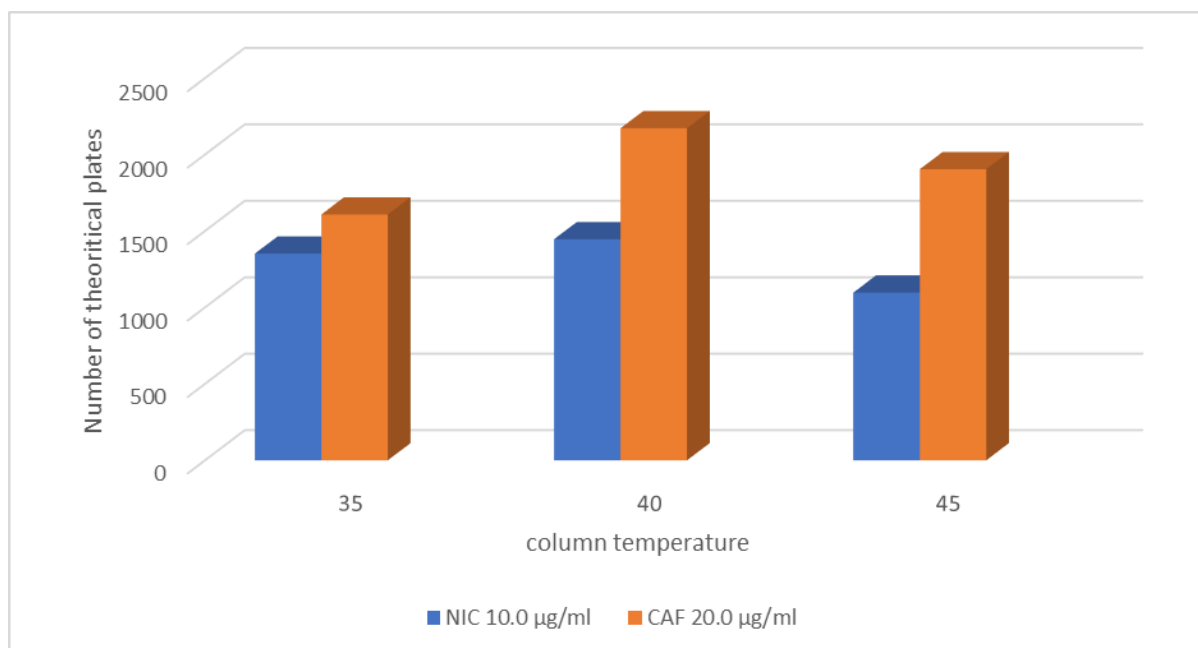

**Fig. S5.** Effect of column temperature in Celsius degree on the number of theoretical plates of NIC 10.0 µg/ml and CAF20.0 µg/ml using mobile phase consisting of Glycerol: 0.2 M OPA, (5: 95% v/v), pH 3.0. Flow rate, 1.0 mL/min, UV detection at 260 nm.

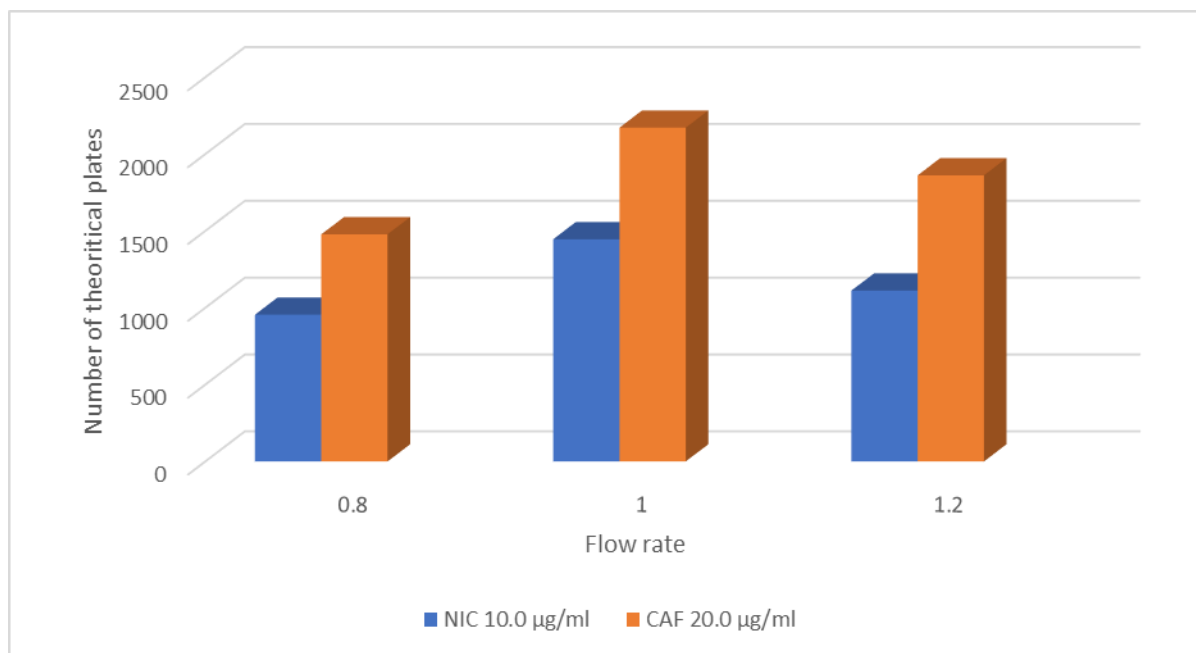

**Fig. S6.** Effect of flow rate on the number of theoretical plates of NIC 10.0 µg/ml and CAF 20.0 µg/ml using mobile phase consisting of Glycerol: 0.2 M OPA, (5: 95% v/v), pH 3.0. UV detection at 260 nm, column temperature, 40 degrees Celsius.

**Table S1. Composition of 0.4% (w/w) NIC and 4% (w/w) CAF QMS**

| <b>Ingredients</b>              | <b>Amount %(w/w)</b> |
|---------------------------------|----------------------|
| <b>NIC</b>                      | 0.4                  |
| <b>CAF</b>                      | 4                    |
| <b>Ethanol</b>                  | 15                   |
| <b>Propylene glycol</b>         | 10                   |
| <b>Butylated hydroxytoluene</b> | 0.1                  |
| <b>Distilled Water to</b>       | 100                  |



**Table S2: Optimization of the chromatographic parameters for separation of mixture of NIC and CAF by the proposed green chromatographic method.**

| Parameter                                 | No. of theoretical plates (N) |                | Mass distribution ratio (Dm) |              | Resolution (Rs) | Pressure    | Relative retention ( $\alpha$ ) |             |
|-------------------------------------------|-------------------------------|----------------|------------------------------|--------------|-----------------|-------------|---------------------------------|-------------|
|                                           | NIC                           | CAF            | NIC                          | CAF          | Rs              | p.          | $\alpha$                        |             |
| pH                                        | <u>3.0</u>                    | <u>1445.64</u> | <u>2171.9</u>                | <u>1.33</u>  | <u>2.6</u>      | <u>5.64</u> | <u>1960</u>                     | <u>1.95</u> |
|                                           | 3.5                           | 1394.7         | 1601.1                       | 0.98         | 2.54            | 4.86        | 2143                            | 1.51        |
|                                           | 4.5                           | 1246.5         | 1538.8                       | 0.84         | 2.46            | 4.88        | 2613                            | 1.57        |
|                                           | 5.5                           | 1198.1         | 1477.9                       | 0.78         | 2.5             | 5.11        | 2876                            | 1.61        |
| Percentage Ratio of [Glycerol: 0.2 M OPA] | <u>(5:95)</u>                 | <u>1445.64</u> | <u>2171.9</u>                | <u>1.33</u>  | <u>2.6</u>      | <u>5.64</u> | <u>1960</u>                     | <u>1.95</u> |
|                                           | (6:94)                        | 1387.9         | 1418.2                       | 1.08         | 2.78            | 4.91        | 2589                            | 2.58        |
|                                           | (7:93)                        | 1207.7         | 1246.5                       | 0.833        | 2.5             | 4.66        | 2789                            | 2.9         |
|                                           | <u>(8:92)</u>                 | <u>1173.9</u>  | <u>1085.5</u>                | <u>0.769</u> | <u>2.23</u>     | <u>4.15</u> | <u>3098</u>                     | <u>3.1</u>  |
| Molarity of OPA                           | 0.1                           | 1194.74        | 1592.8                       | 1.21         | 2.54            | 4.83        | 1960                            | 2.1         |
|                                           | <u>0.2</u>                    | <u>1445.64</u> | <u>2171.9</u>                | <u>1.33</u>  | <u>2.6</u>      | <u>5.64</u> | <u>1960</u>                     | <u>1.55</u> |
|                                           | 0.3                           | 1275.3         | 1831.4                       | 0.833        | 2.5             | 4.93        | 2148                            | 2.8         |
| Temp.                                     | 35                            | 1352           | 1608.1                       | 1.08         | 2.83            | 4.88        | 2780                            | 2.61        |
|                                           | <u>40</u>                     | <u>1445.64</u> | <u>2171.9</u>                | <u>1.33</u>  | <u>2.6</u>      | <u>5.64</u> | <u>1960</u>                     | <u>1.55</u> |
|                                           | 45                            | 1097.3         | 1903.5                       | 1.37         | 2.8             | 5.59        | 1890                            | 2.03        |
| Flow rate                                 | 0.8                           | 955.2          | 1477.9                       | 0.73         | 2.26            | 4.62        | 1597                            | 3.09        |
|                                           | <u>1.0</u>                    | <u>1445.64</u> | <u>2171.9</u>                | <u>1.33</u>  | <u>2.6</u>      | <u>5.64</u> | <u>1960</u>                     | <u>2.77</u> |
|                                           | 1.2                           | 1111.8         | 1862                         | 1.12         | 3.12            | 5.33        | 2464                            | 1.55        |

Where: Number of theoretical plates (N) =  $5.45(t_R/W_{h/2})^2$ ,

- $W_{h/2}$  is the half peak width
- Resolution (R) =  $2 \Delta t_R/W_1 + W_2$ ,
- $W_1$  and  $W_2$  are the peaks width of the two components measured at their bases.
- Relative retention ( $\alpha$ ) =  $Dm_2/Dm_1$ ,

Mass distribution ratio (Dm) =  $t_R - t_m / t_m$ ,  $t_R$  is time of retention of the measured substance measured from the injection point and  $t_m$  is the retention time of a non-retained marker.

**Table S3: Robustness results for determination of NIC and CAF by the proposed green chromatographic method.**

| Parameter                                   | Value      | NIC        |                          |      | CAF        |                          |      |
|---------------------------------------------|------------|------------|--------------------------|------|------------|--------------------------|------|
|                                             |            | % Recovery | Mean % recovery $\pm$ SD | %RSD | % Recovery | Mean % recovery $\pm$ SD | %RSD |
| <b>pH</b>                                   | 2.9        | 99.52      |                          |      | 102.54     |                          |      |
|                                             | <u>3.0</u> | 101.02     | 100.49 $\pm$ 0.84        | 0.84 | 99.76      | 101.03 $\pm$ 1.41        | 1.40 |
|                                             | 3.1        | 100.94     |                          |      | 100.78     |                          |      |
| <b>Glycerol concentration %</b>             | 4.6        | 98.42      |                          |      | 97.51      |                          |      |
|                                             | <u>5.0</u> | 98.94      | 99.19 $\pm$ 0.92         | 0.93 | 98.74      | 98.28 $\pm$ 0.67         | 0.68 |
|                                             | 5.4        | 100.21     |                          |      | 98.58      |                          |      |
| <b>Temperature (<math>^{\circ}</math>C)</b> | 38         | 98.51      |                          |      | 100.81     |                          |      |
|                                             | <u>40</u>  | 100.78     | 100.34 $\pm$ 1.65        | 1.64 | 101.92     | 101.87 $\pm$ 1.03        | 1.01 |
|                                             | 42         | 101.73     |                          |      | 102.87     |                          |      |
| <b>Flow rate</b>                            | 0.9        | 98.24      |                          |      | 99.52      |                          |      |
|                                             | <u>1.0</u> | 100.58     | 98.78 $\pm$ 1.6          | 1.62 | 98.74      | 99.67 $\pm$ 1.01         | 1.01 |
|                                             | 1.1        | 97.53      |                          |      | 100.75     |                          |      |

**Table S4. Kinetic modeling of release data from NIC/CAF QMS and trade marketing formulations through cellophane membrane.**

| Drug | Formula | R <sup>2</sup> |             |               | Release Order | Korsmeyer et al |      | Main transport mechanism |
|------|---------|----------------|-------------|---------------|---------------|-----------------|------|--------------------------|
|      |         | Zero-Order     | First Order | Higuchi Model |               | R <sup>2</sup>  | n    |                          |
| NIC  | Gum     | 0.6004         | 0.3249      | 0.7647        | Diffusion     | 0.6440          | 1.26 | Super case II            |
|      | QMS     | 0.7885         | 0.6233      | 0.9348        |               | 0.9078          | 0.62 | Non-Fickian              |
| CAF  | Patch   | 0.8141         | 0.7058      | 0.9699        |               | 0.9513          | 0.50 |                          |
|      | QMS     | 0.7580         | 0.6178      | 0.9313        |               | 0.9111          | 0.56 |                          |

**Table S5. Assessment of green analytical performance of the developed HPLC/UV method using analytical Eco-scale.**

| Proposed method                             |     | Reported method [21]                         |     |
|---------------------------------------------|-----|----------------------------------------------|-----|
| Reagents                                    | PPs | Reagents                                     | PPs |
| Glycerol                                    | 0   | Acetonitrile                                 | 4   |
| OPA                                         | 3   | Methanol                                     | 5   |
| TEA                                         | 2   | Diethyl amine                                | 2   |
|                                             |     | Acetic acid                                  | 4   |
|                                             | Σ5  |                                              | Σ15 |
| <b>Instruments</b>                          |     | <b>Instruments</b>                           |     |
| HPLC/UV                                     | 1   | HPLC/UV                                      | 1   |
| Occupational hazards                        | 0   | Occupational hazards                         | 0   |
| waste                                       | 3   | waste                                        | 5   |
|                                             | Σ4  |                                              | Σ6  |
| <b>Total PPs: 9</b>                         |     | <b>Total PPs: 21</b>                         |     |
| <b>Score: 91 (excellent green analysis)</b> |     | <b>Score: 79 (acceptable green analysis)</b> |     |

**Table S6. Comparison of the developed green HPLC method to reported methods**

| <b>Method</b>   | <b>Mobile phase</b>                                                                                               | <b>Run time</b> | <b>Analysis throughput</b> | <b>Sample</b>                       | <b>Limitations</b>                                                                                | <b>Ref.</b> |
|-----------------|-------------------------------------------------------------------------------------------------------------------|-----------------|----------------------------|-------------------------------------|---------------------------------------------------------------------------------------------------|-------------|
| <b>HPLC-UV</b>  | Water: methanol: buffer acetate (pH 4.66): acetonitrile: acetic acid (50:29:20:2:1, v/v)                          | 10 min          | 6 samples per hour         | Meconium                            | -Utilization of hazardous solvents.<br>-Long runtime.                                             | [19]        |
| <b>HPLC-UV</b>  | Methanol: buffer (5 mM sodium octane sulphonate, 10 mM citric acid adjusted to pH 5.8 with triethylamine) (20:80) | > 22 min        | 2 samples per hour         | Human milk                          | -Utilization of hazardous solvents.<br>-Long runtime.<br>- high buffer loads.                     | [20]        |
| <b>GC-MS/MS</b> | Helium 5.0                                                                                                        | > 11 min        | 5 samples per hour         | Chocolate                           | Utilization of highly sophisticated and expensive instrumentation.<br>Tedious sample preparation. | [21]        |
| <b>HPLC-UV</b>  | Glycerol: orthophosphoric acid (0.2 M) adjusted to pH 3.0 using 0.05 M triethylamine (5:95, v/v)                  | 5 min           | 12 samples per hour        | Dosage forms and artificial saliva. | -                                                                                                 | This work   |
